# Supplementary material for: Ubiquitin carboxyl-terminal hydrolase-L5 promotes TGFβ-1 signaling by de-ubiquitinating and stabilizing Smad2/Smad3 in pulmonary fibrosis
Source: PubMed Central journal article supplement (PMC5015047; doi:10.1038/srep33116), 2016-09-08

## Supplemental support data

### Ubiquitin carboxyl-terminal hydrolase-L5 promotes TGF $\beta$ -1 signaling by de-ubiquitinating and stabilizing Smad2/Smad3 in pulmonary fibrosis

Ling Nan <sup>1</sup>, Anastasia M Jacko <sup>2</sup>, Jiangning Tan <sup>2</sup>, Dan Wang <sup>1</sup>, Jing Zhao <sup>2</sup>, Daniel J Kass <sup>2</sup>, Haichun Ma <sup>1†</sup>, Yutong Zhao <sup>2#†</sup>

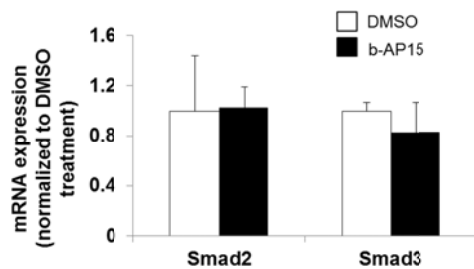

**Suppl. Fig. 1. b-AP15 has no effect on mRNA levels of Smad2 and Smad3.** HLF cells were treated with b-AP15 (10  $\mu$ M) for 1 h. Total RNA was isolated and cDNA was synthesized by reverse transcription. Quantitative PCR was performed to assess mRNA expression of Smad2 and Smad3.

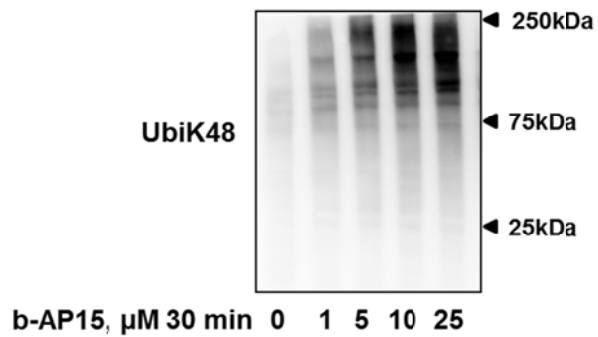

**Suppl. Fig. 2. b-AP15 causes accumulation of poly-ubiquitination in HLF cells.** HLF cells were treated with different doses of b-AP15 (0, 1, 5, 10, 25  $\mu\text{M}$ ) for 1 h and then cell lysates were analyzed by immunoblotting with an ubiquitinK48 antibody. Western blot images were cropped to improve the conciseness of the data; samples derived from the same experiment and the blots were processed in parallel. Representative of experiments performed at least 3 independent times.

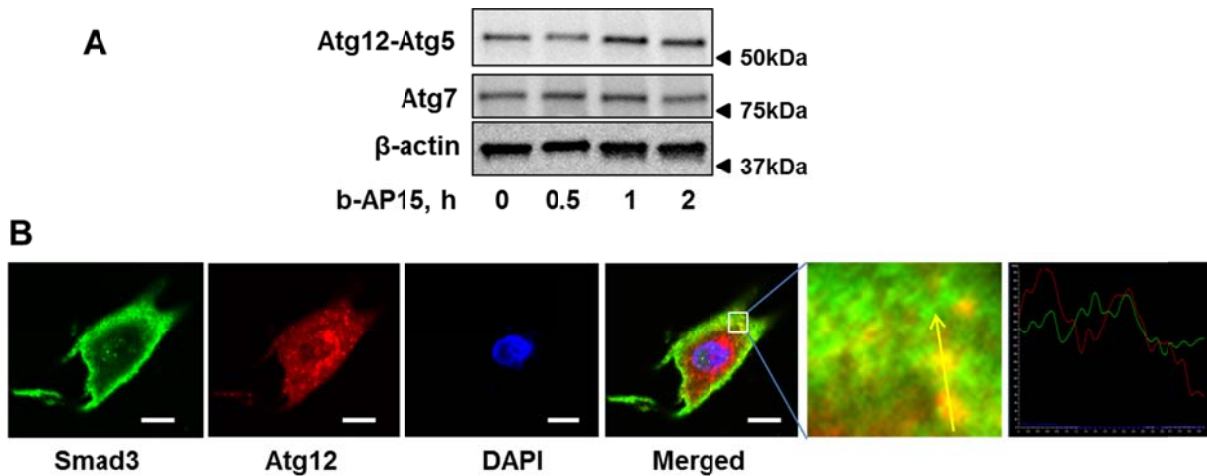

**Suppl. Fig. 3. b-AP15 increases Atg12-Atg5 conjugation and co-localization of Smad3 and Atg12.** **A.** Mrc5 cells were treated with b-AP15 (5  $\mu$ M) for 0-2 h. Cell lysates were analyzed by Atg12, Atg7, and  $\beta$ -actin antibodies. Western blot images were cropped to improve the conciseness of the data; samples derived from the same experiment and the blots were processed in parallel. Representative of experiments performed at least 3 independent times. **B.** HLF cells were treated with bafilomycin A1 (10  $\mu$ M, 1 h) prior to b-AP15 (5  $\mu$ M) for 1 h. The localization of Smad3 and Atg12 were detected by immunofluorescence staining. Smad3, green; Atg12, red; nuclei, blue. Scale bar, 10  $\mu$ m. Co-localization was analyzed by NIS-Elements software. 94% of the cells with double staining show positive co-localization.

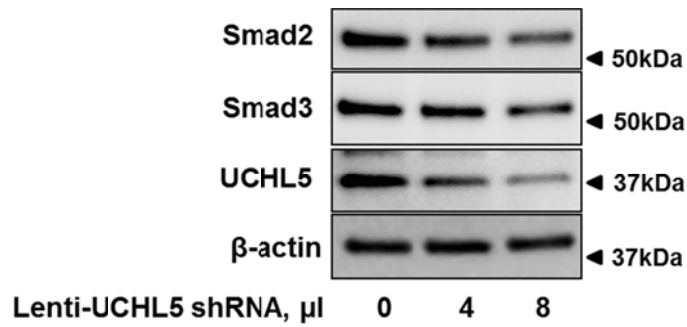

**Suppl. Fig. 4. UCHL5 shRNA reduces Smad2/Smad3 levels.** HLF cells were infected with different doses of lentivirus vector containing UCHL5 shRNA (0, 4, and 8 μl) and incubated for 72 h. Cell lysates were analyzed by Smad2, Smad3, UCHL5, and β-actin antibodies. Western blot images were cropped to improve the conciseness of the data; samples derived from the same experiment and the blots were processed in parallel. Representative of experiments performed at least 3 independent times.

Fig. 1A

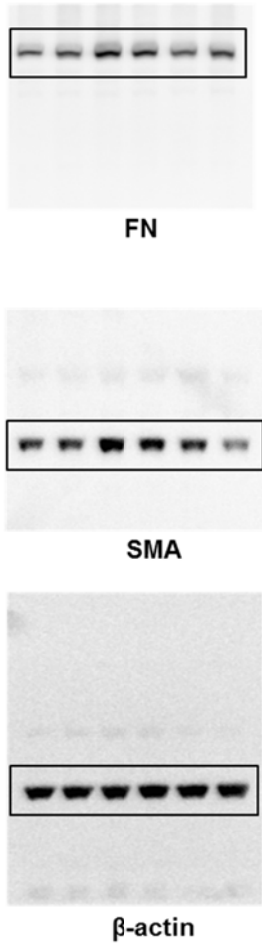

Fig. 1C

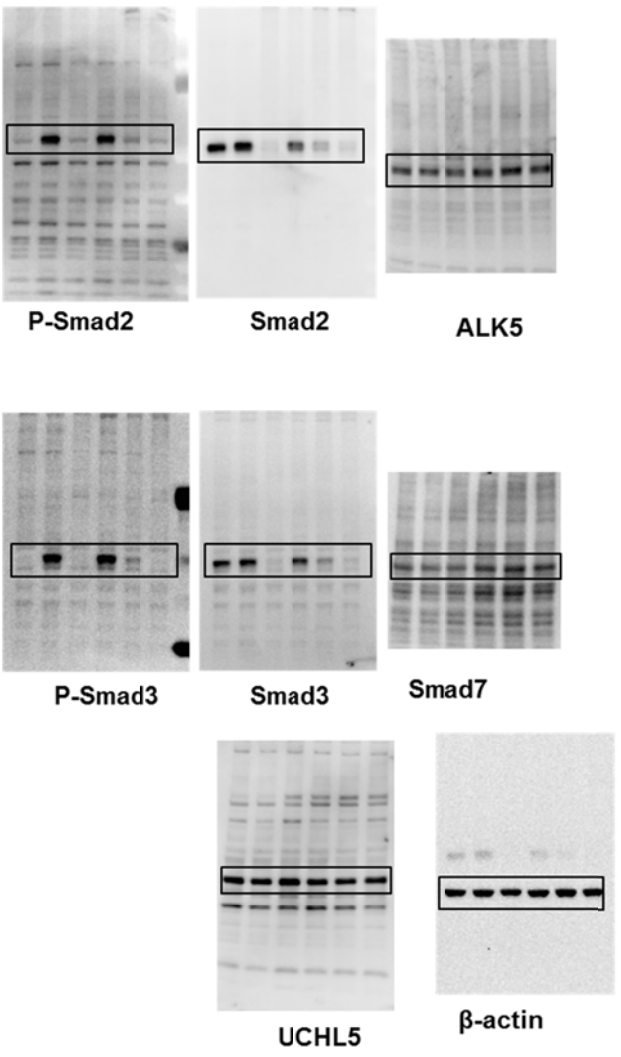

Fig. 2A

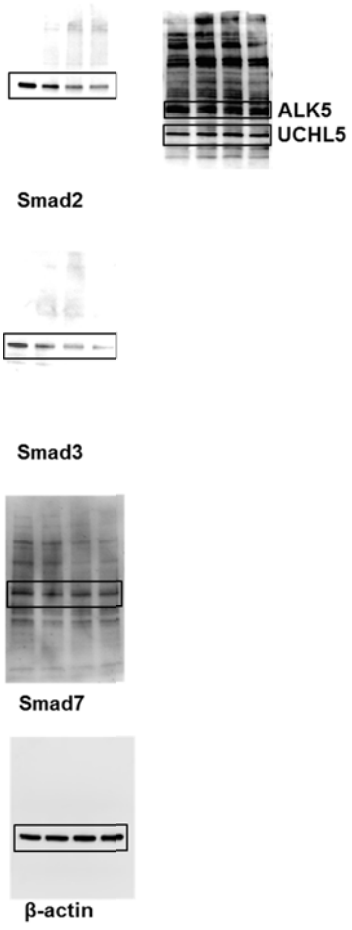

Fig. 2B

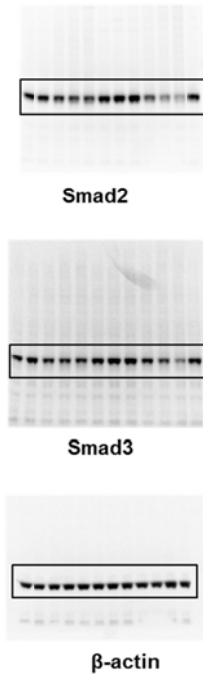

Fig. 2C

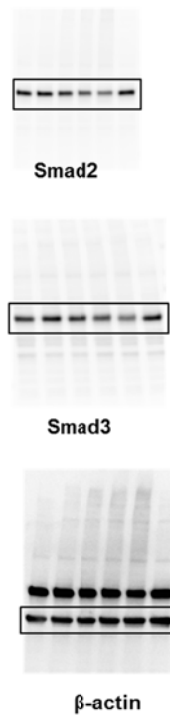

Fig. 2D

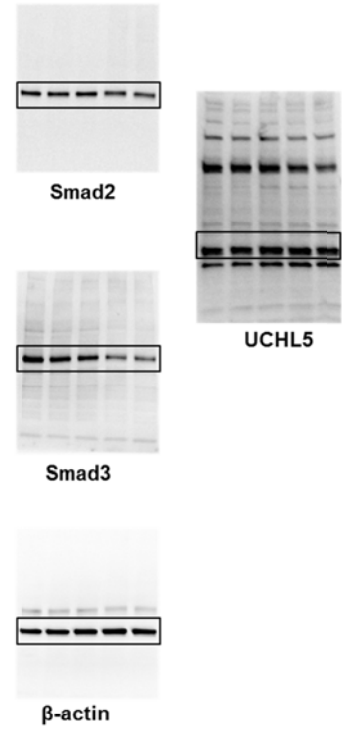

Fig. 3A

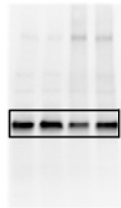

Smad2

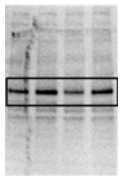

Smad3

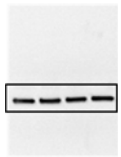

$\beta$ -actin

Fig. 3B

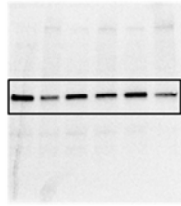

Smad2

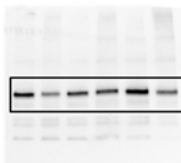

Smad3

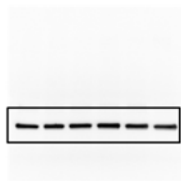

$\beta$ -actin

Fig. 3C

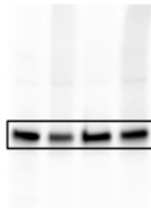

Smad2

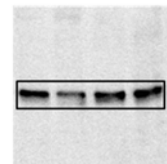

Smad3

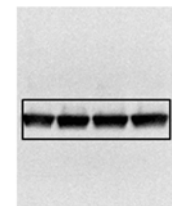

$\beta$ -actin

Fig. 3E

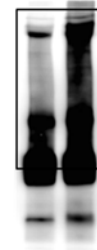

Smad2

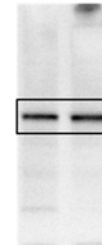

Smad2

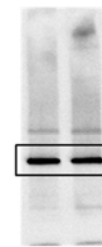

$\beta$ -actin

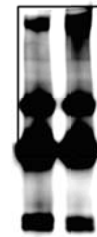

Smad3

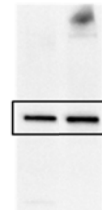

Smad3

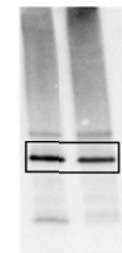

$\beta$ -actin

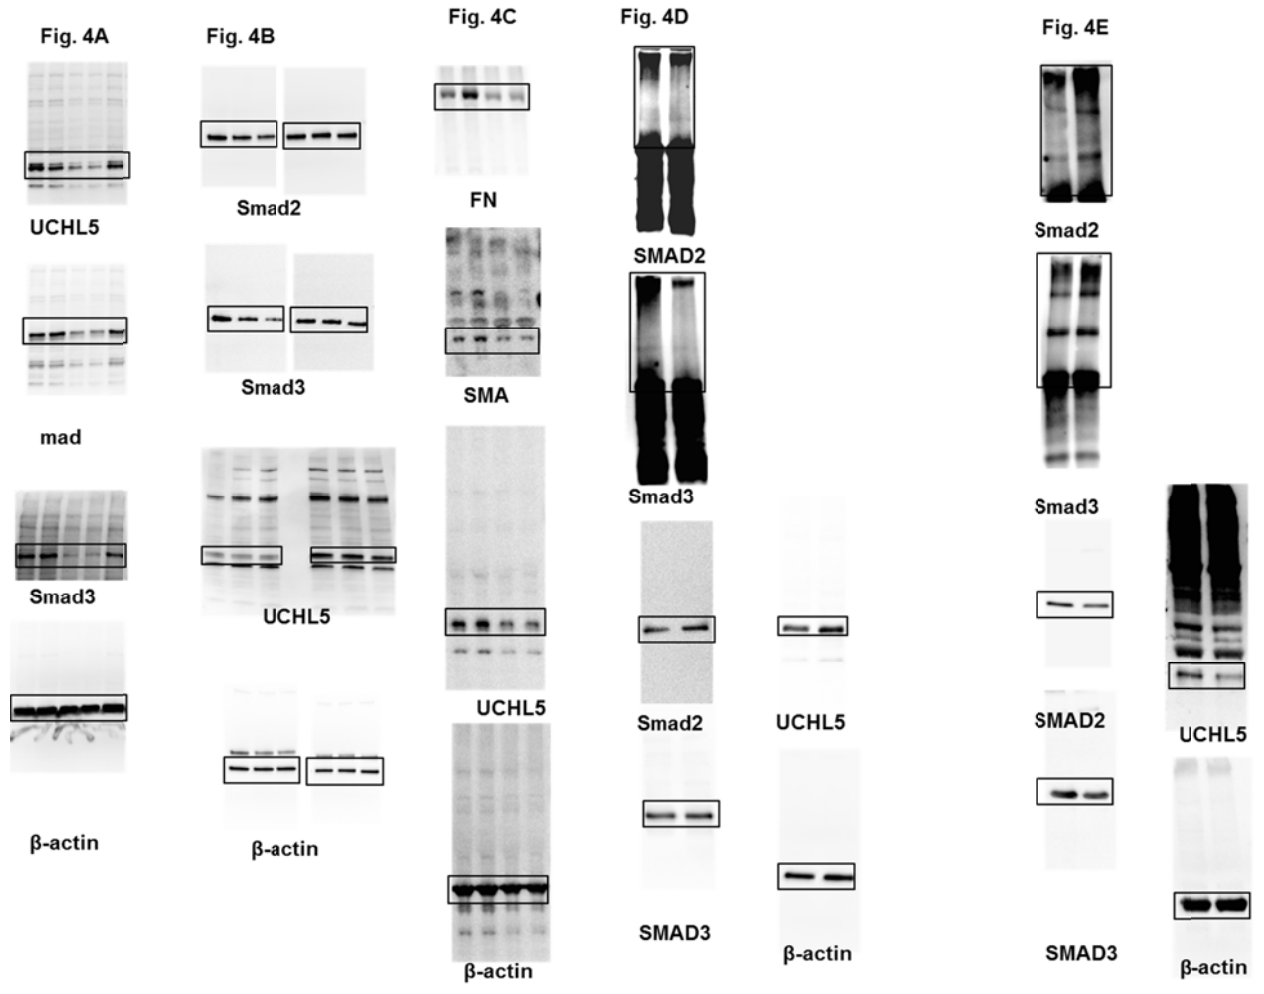



Fig. 5A

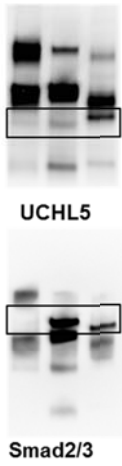

Fig. 5B

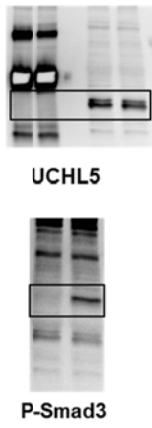

Fig. 6B

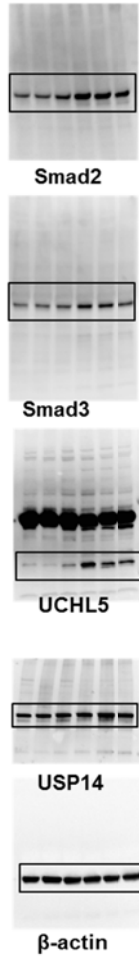

Fig. 7A

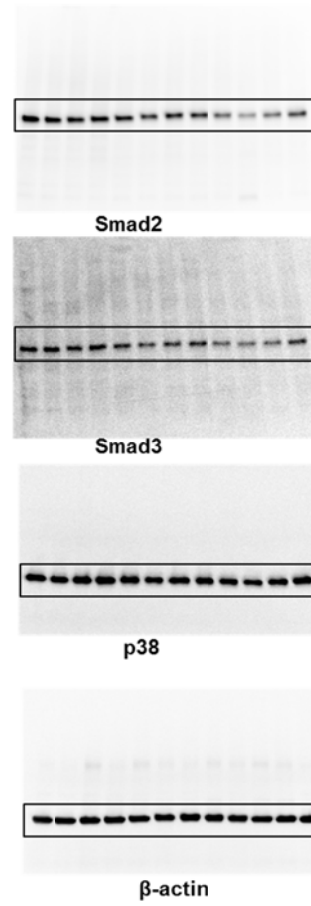

Fig. 7C

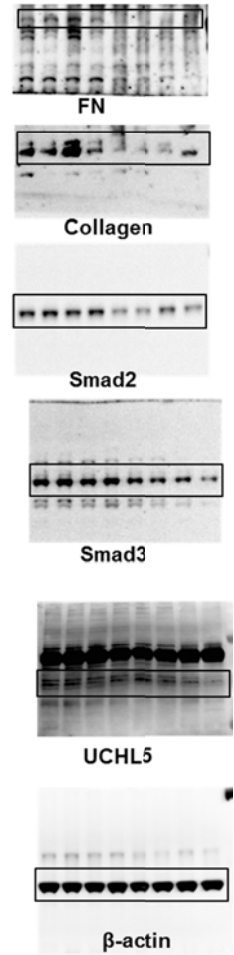

Fig. 5D

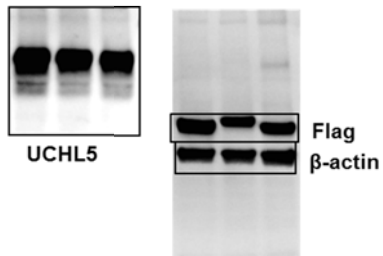

Supplement: srep33116-s1.pdf [file srep33116-s1.pdf]
